# Supplementary material
Source: MDPI journal article supplement (https://www.mdpi.com/2304-6740/6/3/86)

# checkCIF/PLATON report

Structure factors have been supplied for datablock(s) mdx1\_a

THIS REPORT IS FOR GUIDANCE ONLY. IF USED AS PART OF A REVIEW PROCEDURE FOR PUBLICATION, IT SHOULD NOT REPLACE THE EXPERTISE OF AN EXPERIENCED CRYSTALLOGRAPHIC REFEREE.

No syntax errors found.      CIF dictionary      Interpreting this report

## Datablock: mdx1\_a

---

|                 |                                       |                               |
|-----------------|---------------------------------------|-------------------------------|
| Bond precision: | C-C = 0.0182 Å                        | Wavelength=0.71073            |
| Cell:           | a=22.513(5)                           | b=12.233(3)      c=37.764(16) |
|                 | alpha=90                              | beta=102.01(3)      gamma=90  |
| Temperature:    | 120 K                                 |                               |
|                 | Calculated                            | Reported                      |
| Volume          | 10173(6)                              | 10173(6)                      |
| Space group     | I 2/c                                 | I 2 / c                       |
| Hall group      | -I 2yc                                | ?                             |
| Moiety formula  | C34 H34 N10 V, 3(F6 P),<br>3(C2 H3 N) | ?                             |
| Sum formula     | C40 H43 F18 N13 P3 V                  | C40 H43 F18 N13 P3 V          |
| Mr              | 1191.72                               | 1191.72                       |
| Dx,g cm-3       | 1.556                                 | 1.556                         |
| Z               | 8                                     | 8                             |
| Mu (mm-1)       | 0.401                                 | 0.401                         |
| F000            | 4832.0                                | 4832.0                        |
| F000'           | 4840.03                               |                               |
| h,k,lmax        | 30,16,50                              | 30,16,50                      |
| Nref            | 12883                                 | 12717                         |
| Tmin,Tmax       | 0.930,0.984                           | 0.861,1.147                   |
| Tmin'           | 0.880                                 |                               |

Correction method= # Reported T Limits: Tmin=0.861 Tmax=1.147  
AbsCorr = MULTI-SCAN

Data completeness= 0.987      Theta(max)= 28.483

R(reflections)= 0.1357( 4529)      wR2(reflections)= 0.3895( 12717)

S = 1.039      Npar= 780

---

The following ALERTS were generated. Each ALERT has the format

**test-name\_ALERT\_alert-type\_alert-level.**

Click on the hyperlinks for more details of the test.

### Alert level A

RINTA01\_ALERT\_3\_A The value of Rint is greater than 0.25

Rint given 0.277

PLAT020\_ALERT\_3\_A The Value of Rint is Greater Than 0.12 ..... 0.277 Report

PLAT214\_ALERT\_2\_A Atom F13A (Anion/Solvent) ADP max/min Ratio 6.2 prolat

### Alert level B

PLAT026\_ALERT\_3\_B Ratio Observed / Unique Reflections (too) Low .. 36% Check

PLAT084\_ALERT\_3\_B High wR2 Value (i.e. > 0.25) ..... 0.39 Report

PLAT214\_ALERT\_2\_B Atom F14A (Anion/Solvent) ADP max/min Ratio 5.7 prolat

PLAT341\_ALERT\_3\_B Low Bond Precision on C-C Bonds ..... 0.01822 Ang.

### Alert level C

PLAT082\_ALERT\_2\_C High R1 Value ..... 0.14 Report

PLAT094\_ALERT\_2\_C Ratio of Maximum / Minimum Residual Density .... 2.13 Report

PLAT234\_ALERT\_4\_C Large Hirshfeld Difference C32 --C33 0.16 Ang.

PLAT243\_ALERT\_4\_C High 'Solvent' Ueq as Compared to Neighbors of C201 Check

PLAT244\_ALERT\_4\_C Low 'Solvent' Ueq as Compared to Neighbors of C101 Check

PLAT244\_ALERT\_4\_C Low 'Solvent' Ueq as Compared to Neighbors of C301 Check

PLAT250\_ALERT\_2\_C Large U3/U1 Ratio for Average U(i,j) Tensor .... 3.8 Note

PLAT601\_ALERT\_2\_C Structure Contains Solvent Accessible VOIDS of . 58 Ang\*\*3

PLAT906\_ALERT\_3\_C Large K Value in the Analysis of Variance ..... 23.281 Check

PLAT906\_ALERT\_3\_C Large K Value in the Analysis of Variance ..... 3.759 Check

PLAT906\_ALERT\_3\_C Large K Value in the Analysis of Variance ..... 2.116 Check

PLAT911\_ALERT\_3\_C Missing FCF Refl Between Thmin & STh/L= 0.600 37 Report

PLAT918\_ALERT\_3\_C Reflection(s) with I(obs) much Smaller I(calc) . 1 Check

PLAT921\_ALERT\_1\_C R1 in the CIF and FCF Differ by ..... 0.0012 Check

PLAT922\_ALERT\_1\_C wR2 in the CIF and FCF Differ by ..... 0.0014 Check

PLAT978\_ALERT\_2\_C Number C-C Bonds with Positive Residual Density. 0 Info

### Alert level G

PLAT002\_ALERT\_2\_G Number of Distance or Angle Restraints on AtSite 23 Note

PLAT003\_ALERT\_2\_G Number of Uiso or Uij Restrained non-H Atoms ... 14 Report

PLAT072\_ALERT\_2\_G SHELXL First Parameter in WGHT Unusually Large 0.11 Report

PLAT083\_ALERT\_2\_G SHELXL Second Parameter in WGHT Unusually Large 152.04 Why ?

PLAT175\_ALERT\_4\_G The CIF-Embedded .res File Contains SAME Records 3 Report

PLAT187\_ALERT\_4\_G The CIF-Embedded .res File Contains RIGU Records 3 Report

PLAT244\_ALERT\_4\_G Low 'Solvent' Ueq as Compared to Neighbors of P1 Check

PLAT244\_ALERT\_4\_G Low 'Solvent' Ueq as Compared to Neighbors of P2 Check

PLAT302\_ALERT\_4\_G Anion/Solvent/Minor-Residue Disorder (Resd 4 ) 100% Note

PLAT302\_ALERT\_4\_G Anion/Solvent/Minor-Residue Disorder (Resd 5 ) 100% Note

PLAT302\_ALERT\_4\_G Anion/Solvent/Minor-Residue Disorder (Resd 6 ) 100% Note

PLAT302\_ALERT\_4\_G Anion/Solvent/Minor-Residue Disorder (Resd 7 ) 100% Note

PLAT304\_ALERT\_4\_G Non-Integer Number of Atoms in ..... Resd 4 3.57 Check

PLAT304\_ALERT\_4\_G Non-Integer Number of Atoms in ..... Resd 5 3.66 Check

PLAT304\_ALERT\_4\_G Non-Integer Number of Atoms in ..... Resd 6 3.43 Check

PLAT304\_ALERT\_4\_G Non-Integer Number of Atoms in ..... Resd 7 3.34 Check

PLAT432\_ALERT\_2\_G Short Inter X...Y Contact F5 ..C22 2.96 Ang.

PLAT432\_ALERT\_2\_G Short Inter X...Y Contact F7 ..C28 2.88 Ang.

PLAT432\_ALERT\_2\_G Short Inter X...Y Contact F18 ..C202 2.74 Ang.

PLAT432\_ALERT\_2\_G Short Inter X...Y Contact N100 ..C302 3.04 Ang.

PLAT432\_ALERT\_2\_G Short Inter X...Y Contact N200 ..C302 2.61 Ang.

PLAT790\_ALERT\_4\_G Centre of Gravity not Within Unit Cell: Resd. # 4 Note

|                                                                    |      |         |
|--------------------------------------------------------------------|------|---------|
| F6 P                                                               |      |         |
| PLAT790_ALERT_4_G Centre of Gravity not Within Unit Cell: Resd. #  |      | 6 Note  |
| F6 P                                                               |      |         |
| PLAT790_ALERT_4_G Centre of Gravity not Within Unit Cell: Resd. #  |      | 10 Note |
| C2 H3 N                                                            |      |         |
| PLAT794_ALERT_5_G Tentative Bond Valency for V1 (III) .            | 2.86 | Info    |
| PLAT860_ALERT_3_G Number of Least-Squares Restraints .....         | 84   | Note    |
| PLAT910_ALERT_3_G Missing # of FCF Reflection(s) Below Theta(Min). | 3    | Note    |
| PLAT912_ALERT_4_G Missing # of FCF Reflections Above STh/L= 0.600  | 126  | Note    |
| PLAT933_ALERT_2_G Number of OMIT Records in Embedded .res File ... | 4    | Note    |

---

3 **ALERT level A** = Most likely a serious problem - resolve or explain  
 4 **ALERT level B** = A potentially serious problem, consider carefully  
 16 **ALERT level C** = Check. Ensure it is not caused by an omission or oversight  
 29 **ALERT level G** = General information/check it is not something unexpected

2 ALERT type 1 CIF construction/syntax error, inconsistent or missing data  
 17 ALERT type 2 Indicator that the structure model may be wrong or deficient  
 12 ALERT type 3 Indicator that the structure quality may be low  
 20 ALERT type 4 Improvement, methodology, query or suggestion  
 1 ALERT type 5 Informative message, check

---

It is advisable to attempt to resolve as many as possible of the alerts in all categories. Often the minor alerts point to easily fixed oversights, errors and omissions in your CIF or refinement strategy, so attention to these fine details can be worthwhile. In order to resolve some of the more serious problems it may be necessary to carry out additional measurements or structure refinements. However, the purpose of your study may justify the reported deviations and the more serious of these should normally be commented upon in the discussion or experimental section of a paper or in the "special\_details" fields of the CIF. checkCIF was carefully designed to identify outliers and unusual parameters, but every test has its limitations and alerts that are not important in a particular case may appear. Conversely, the absence of alerts does not guarantee there are no aspects of the results needing attention. It is up to the individual to critically assess their own results and, if necessary, seek expert advice.

### Publication of your CIF in IUCr journals

A basic structural check has been run on your CIF. These basic checks will be run on all CIFs submitted for publication in IUCr journals (*Acta Crystallographica*, *Journal of Applied Crystallography*, *Journal of Synchrotron Radiation*); however, if you intend to submit to *Acta Crystallographica Section C* or *E* or *IUCrData*, you should make sure that full publication checks are run on the final version of your CIF prior to submission.

### Publication of your CIF in other journals

Please refer to the *Notes for Authors* of the relevant journal for any special instructions relating to CIF submission.

---

**PLATON version of 23/04/2018; check.def file version of 23/04/2018**

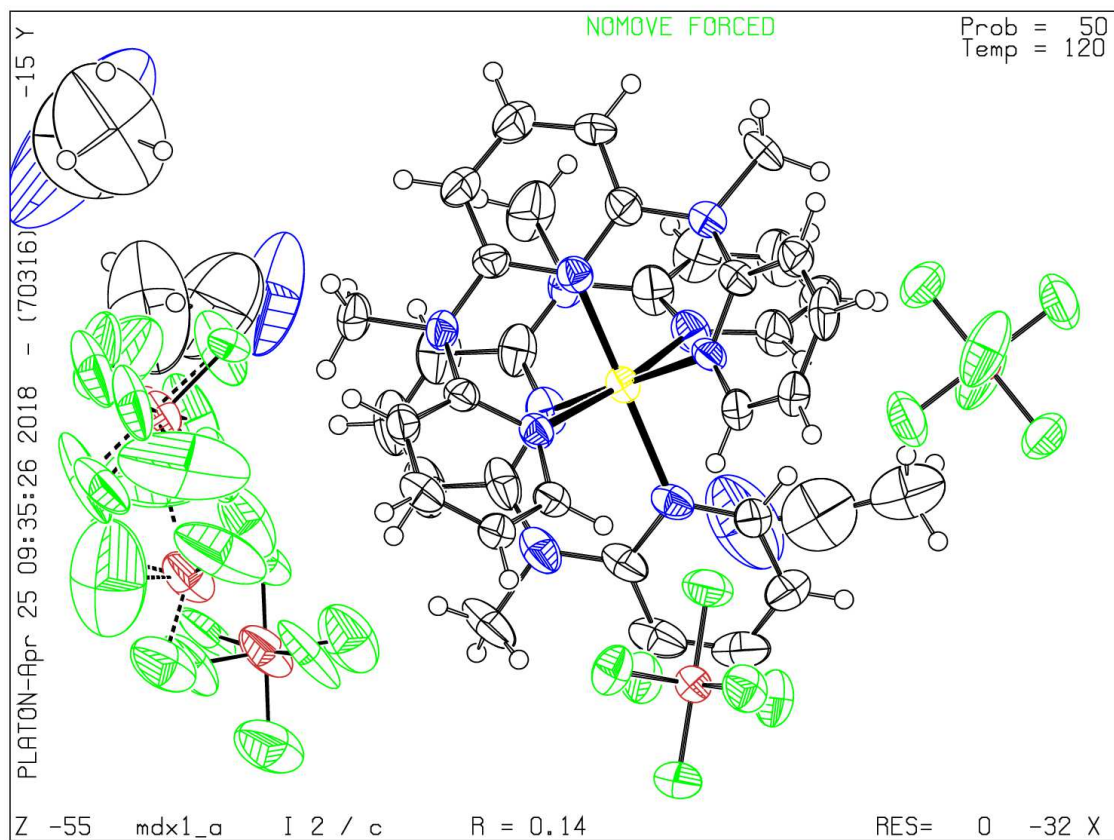

Supplement: s1 [file s1]
