# Supplementary material
Source: MDPI journal article supplement (https://www.mdpi.com/2304-6740/6/3/86)
Supplement: s1 [file s1]

# Supplementary Materials: Ddpd as Expanded Terpyridine: Dramatic Effects of Symmetry and Electronic Properties in First Row Transition Metal Complexes

Christoph Förster, Matthias Dorn, Thomas Reuter, Sven Otto, Güllü Davarci, Tobias Reich, Luca Carrella, Eva Rentschler and Katja Heinze

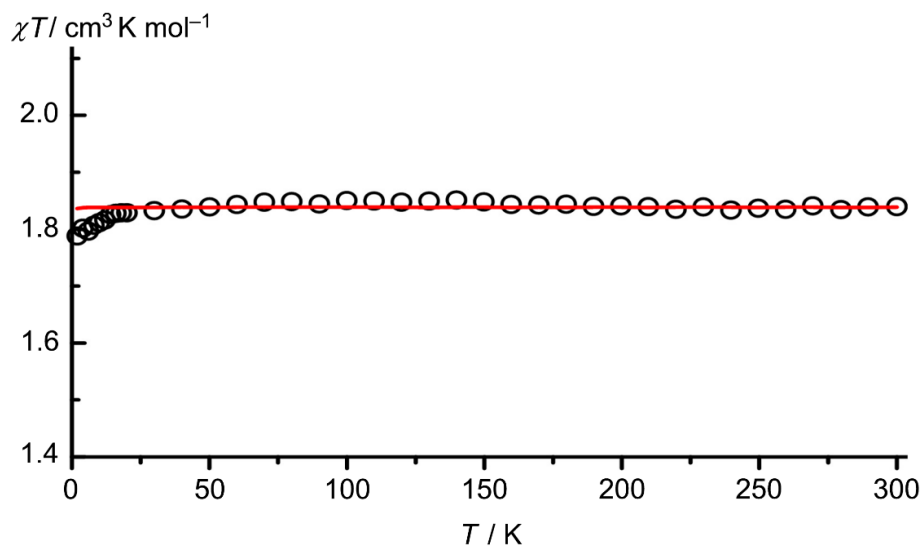

**Figure S1.** Temperature-dependence of  $\chi_{\text{M}}T$  of  $[\text{Cr}(\text{ddpd})_2][\text{BF}_4]_3 \cdot \text{CH}_3\text{CN}$  (black circles) with fit (solid red line,  $g = 1.980$ ).

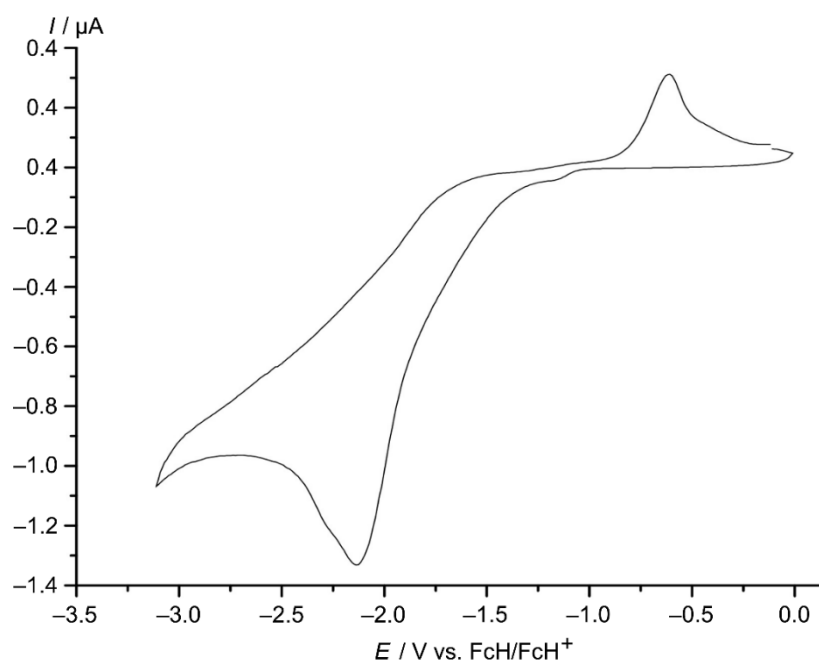

**Figure S2.** Cyclic voltammogram of  $[\text{Ni}(\text{ddpd})_2][\text{BF}_4]_2$  in  $\text{CH}_3\text{CN}$  in the presence of HOAc and  $\text{CO}_2$ .

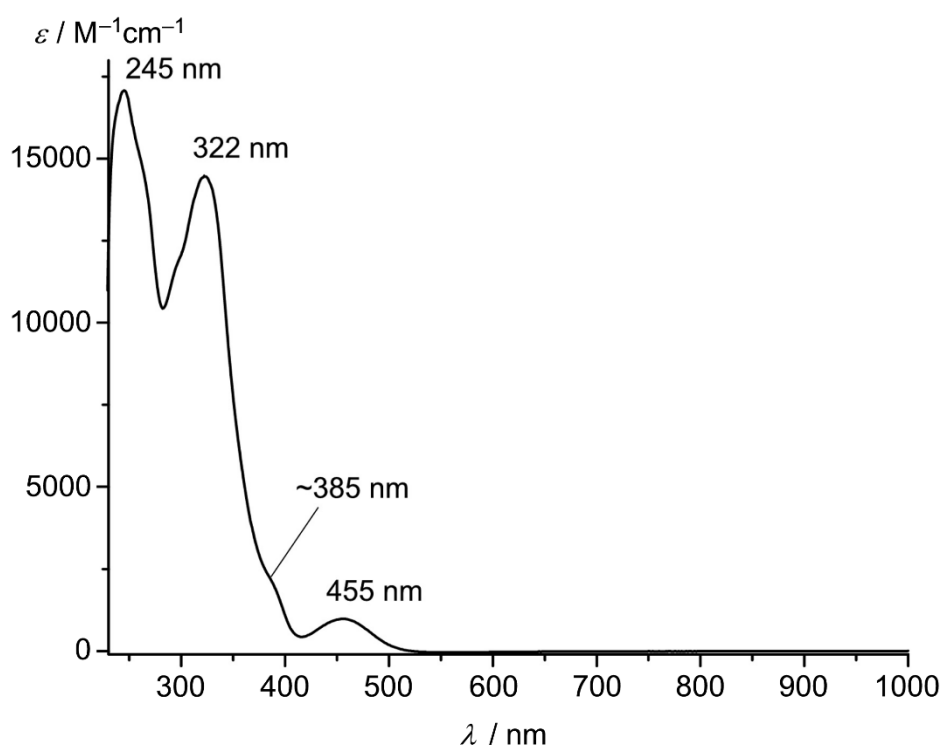

**Figure S3.** UV/Vis spectrum of *mer*-VCl<sub>3</sub>(ddd) in CH<sub>2</sub>Cl<sub>2</sub>.

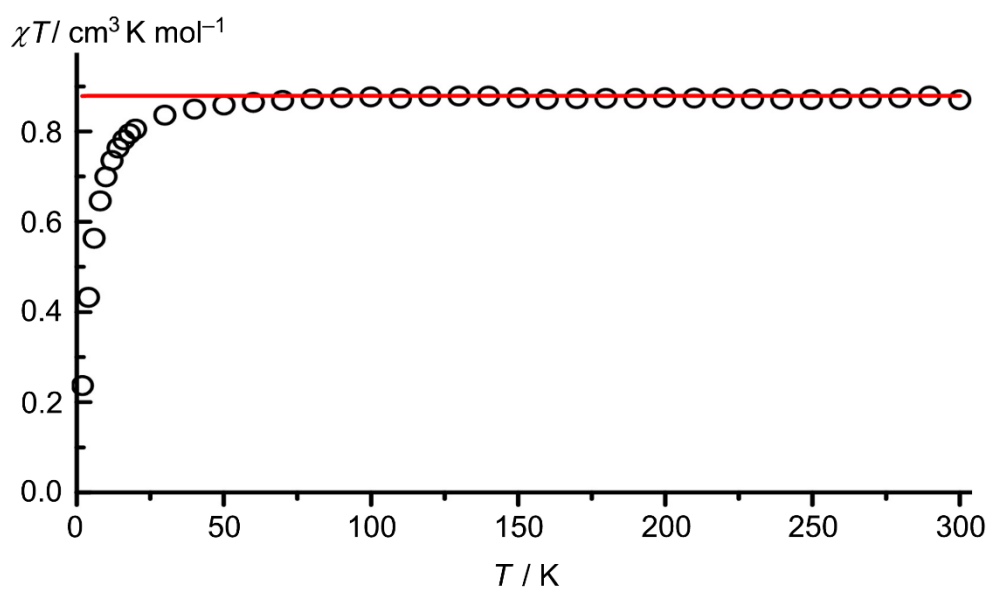

**Figure S4.** Temperature-dependence of  $\chi_M T$  of VCl<sub>3</sub>(ddd) (black circles) with fit (solid red line,  $g = 1.875$ ).

Cartesian Coordinates of the DFT calculated geometry of *fac*-Cr(CO)<sub>3</sub>(ddpd).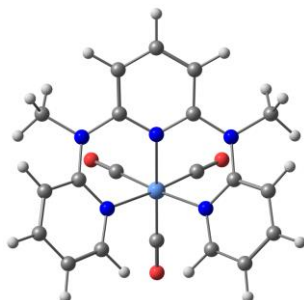

|    |              |              |              |
|----|--------------|--------------|--------------|
| 6  | 1.166997000  | 1.918738000  | -0.508448000 |
| 6  | 1.207652000  | 3.294812000  | -0.793626000 |
| 6  | 0.001044000  | 3.978957000  | -0.907334000 |
| 6  | -1.206027000 | 3.295754000  | -0.792950000 |
| 6  | -1.166241000 | 1.919625000  | -0.507800000 |
| 7  | 0.000192000  | 1.276824000  | -0.293234000 |
| 1  | 2.148108000  | 3.807524000  | -0.958110000 |
| 1  | -2.146176000 | 3.809288000  | -0.956850000 |
| 6  | 1.712312000  | -2.344525000 | -0.713366000 |
| 6  | 2.785024000  | -2.813418000 | -1.463097000 |
| 6  | 3.722701000  | -1.886307000 | -1.926469000 |
| 6  | 3.548737000  | -0.545944000 | -1.599670000 |
| 6  | 2.450890000  | -0.156209000 | -0.808133000 |
| 7  | 1.534786000  | -1.050274000 | -0.381788000 |
| 1  | 4.569718000  | -2.199781000 | -2.534322000 |
| 1  | 0.978048000  | -3.041472000 | -0.324543000 |
| 1  | 2.878295000  | -3.875828000 | -1.675700000 |
| 1  | 4.246785000  | 0.202326000  | -1.961259000 |
| 6  | -2.451093000 | -0.154459000 | -0.807680000 |
| 6  | -3.548433000 | -0.543113000 | -1.600385000 |
| 6  | -3.723265000 | -1.883270000 | -1.927641000 |
| 6  | -2.786877000 | -2.811256000 | -1.463439000 |
| 6  | -1.714457000 | -2.343373000 | -0.712659000 |
| 7  | -1.535980000 | -1.049297000 | -0.380864000 |
| 1  | -4.569887000 | -2.195807000 | -2.536510000 |
| 1  | -4.245504000 | 0.205838000  | -1.962414000 |
| 1  | -2.880707000 | -3.873552000 | -1.676342000 |
| 1  | -0.981139000 | -3.041007000 | -0.323297000 |
| 7  | 2.349282000  | 1.188315000  | -0.410079000 |
| 6  | 3.597062000  | 1.918154000  | -0.188808000 |
| 1  | 4.336055000  | 1.232663000  | 0.233890000  |
| 1  | 4.008757000  | 2.365486000  | -1.104893000 |
| 1  | 3.418788000  | 2.713262000  | 0.540258000  |
| 7  | -2.348874000 | 1.189900000  | -0.409131000 |
| 6  | -3.596310000 | 1.920138000  | -0.187199000 |
| 1  | -4.008951000 | 2.367065000  | -1.103072000 |
| 1  | -4.334932000 | 1.235017000  | 0.236838000  |
| 1  | -3.416924000 | 2.715686000  | 0.541101000  |
| 1  | 0.001458000  | 5.041784000  | -1.143000000 |
| 24 | -0.000124000 | -0.439904000 | 1.001616000  |
| 6  | -0.002362000 | -1.981463000 | 1.945535000  |
| 6  | -1.285415000 | 0.206261000  | 2.117877000  |
| 8  | -2.103421000 | 0.607925000  | 2.857598000  |
| 8  | -0.005850000 | -2.981239000 | 2.566297000  |
| 6  | 1.287679000  | 0.205582000  | 2.115748000  |
| 8  | 2.107513000  | 0.607533000  | 2.853103000  |

-----  
GIBBS FREE ENTHALPYThe Gibbs free enthalpy is  $G = H - T \cdot S$ 

|                          |     |                   |                 |
|--------------------------|-----|-------------------|-----------------|
| Total enthalpy           | ... | -2325.29770765 Eh |                 |
| Total entropy correction | ... | -0.07675478 Eh    | -48.16 kcal/mol |

-----  
Final Gibbs free enthalpy ... -2325.37446243 Eh

Cartesian Coordinates of the DFT calculated geometry of *mer*-Cr(CO)<sub>3</sub>(ddpd).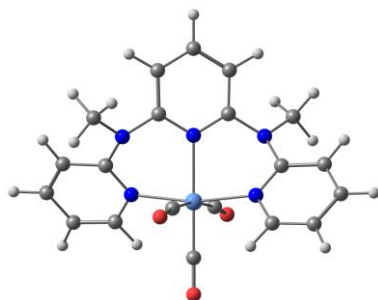

|    |              |              |              |
|----|--------------|--------------|--------------|
| 6  | -1.057645000 | 1.914076000  | 0.487053000  |
| 6  | -1.088658000 | 3.315897000  | 0.510277000  |
| 6  | 0.000296000  | 4.017648000  | 0.000883000  |
| 6  | 1.088979000  | 3.315855000  | -0.509041000 |
| 6  | 1.057499000  | 1.914040000  | -0.486678000 |
| 7  | -0.000134000 | 1.230504000  | 0.000070000  |
| 1  | -1.959830000 | 3.841031000  | 0.887739000  |
| 1  | 1.960311000  | 3.840926000  | -0.886229000 |
| 6  | -2.654490000 | -1.551067000 | -1.311468000 |
| 6  | -4.026284000 | -1.578118000 | -1.522806000 |
| 6  | -4.819651000 | -0.633851000 | -0.860196000 |
| 6  | -4.198919000 | 0.297491000  | -0.034069000 |
| 6  | -2.801107000 | 0.256686000  | 0.128299000  |
| 7  | -2.040516000 | -0.674037000 | -0.484919000 |
| 1  | -5.899518000 | -0.610709000 | -0.998550000 |
| 1  | -2.004969000 | -2.274178000 | -1.795281000 |
| 1  | -4.459010000 | -2.325345000 | -2.184339000 |
| 1  | -4.786292000 | 1.058612000  | 0.469714000  |
| 6  | 2.801062000  | 0.256655000  | -0.128768000 |
| 6  | 4.199003000  | 0.297052000  | 0.032636000  |
| 6  | 4.819950000  | -0.634120000 | 0.858792000  |
| 6  | 4.026692000  | -1.577743000 | 1.522450000  |
| 6  | 2.654774000  | -1.550373000 | 1.311943000  |
| 7  | 2.040578000  | -0.673622000 | 0.485272000  |
| 1  | 5.899924000  | -0.611309000 | 0.996384000  |
| 1  | 4.786316000  | 1.057742000  | -0.471865000 |
| 1  | 4.459609000  | -2.324744000 | 2.184113000  |
| 1  | 2.005328000  | -2.273054000 | 1.796499000  |
| 7  | -2.157040000 | 1.181004000  | 0.969535000  |
| 6  | -2.942212000 | 1.779434000  | 2.043303000  |
| 1  | -3.658007000 | 2.540502000  | 1.698574000  |
| 1  | -3.495499000 | 0.987121000  | 2.557096000  |
| 1  | -2.259865000 | 2.243867000  | 2.760686000  |
| 7  | 2.156655000  | 1.180927000  | -0.969752000 |
| 6  | 2.941368000  | 1.779501000  | -2.043776000 |
| 1  | 3.657475000  | 2.540359000  | -1.699234000 |
| 1  | 3.494251000  | 0.987232000  | -2.558079000 |
| 1  | 2.258724000  | 2.244263000  | -2.760660000 |
| 1  | 0.000501000  | 5.106327000  | 0.001283000  |
| 24 | -0.000040000 | -0.882377000 | 0.000351000  |
| 6  | 0.000097000  | -2.680483000 | 0.000577000  |
| 6  | 0.470889000  | -1.046978000 | -1.808539000 |
| 6  | -0.470955000 | -1.046475000 | 1.809301000  |
| 8  | 0.751495000  | -1.289324000 | -2.914091000 |
| 8  | 0.000176000  | -3.861929000 | 0.000657000  |
| 8  | -0.751543000 | -1.288547000 | 2.914920000  |

-----  
GIBBS FREE ENTHALPY-----  
The Gibbs free enthalpy is  $G = H - T \cdot S$ 

|                          |     |                   |                 |
|--------------------------|-----|-------------------|-----------------|
| Total enthalpy           | ... | -2325.27794198 Eh |                 |
| Total entropy correction | ... | -0.07599064 Eh    | -47.68 kcal/mol |

-----  
Final Gibbs free enthalpy ... -2325.35393261 Eh

Cartesian Coordinates of the DFT calculated geometry of high spin [*mer*-Cr(ddpd)<sub>2</sub>]<sup>2+</sup> (<sup>5</sup>E spin density in orange with an isosurface value of 0.05 a.u.).

CPCM(acetonitrile)-RIJCOSX-B3LYP-D3BJ-ZORA/def2-SVP

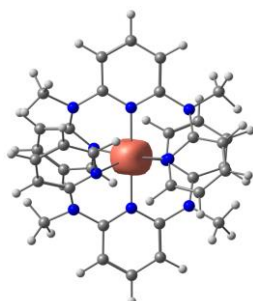

|   |              |              |              |
|---|--------------|--------------|--------------|
| 6 | 1.147667976  | 2.785862094  | 0.251632249  |
| 6 | 1.173872304  | 4.187398093  | 0.264080614  |
| 6 | 0.001776977  | 4.886865109  | -0.002334730 |
| 6 | -1.170997284 | 4.188224138  | -0.267900745 |
| 6 | -1.146094732 | 2.786693961  | -0.253758483 |
| 7 | 0.000468322  | 2.107213969  | -0.000759899 |
| 1 | 2.091644516  | 4.715627056  | 0.500147643  |
| 1 | -2.088368908 | 4.716961641  | -0.504448796 |
| 6 | 1.536932877  | -0.597229972 | 2.677190784  |
| 6 | 2.748880542  | -1.004273642 | 3.215986887  |
| 6 | 3.904383516  | -0.337242544 | 2.786297607  |
| 6 | 3.804231430  | 0.704699522  | 1.869195863  |
| 6 | 2.526767388  | 1.056289648  | 1.377902413  |
| 7 | 1.429490845  | 0.390497884  | 1.771191707  |
| 1 | 4.881156874  | -0.624692684 | 3.171276172  |
| 1 | 0.605589915  | -1.089236224 | 2.956582083  |
| 1 | 2.791373475  | -1.817168214 | 3.936762285  |
| 1 | 4.694854203  | 1.241182062  | 1.564840627  |
| 6 | -2.527473840 | 1.057183958  | -1.377151511 |
| 6 | -3.805731118 | 0.705427669  | -1.866180611 |
| 6 | -3.907443748 | -0.337240427 | -2.782287502 |
| 6 | -2.752709140 | -1.004949930 | -3.213041487 |
| 6 | -1.539871398 | -0.597860752 | -2.676313937 |
| 7 | -1.430882581 | 0.390637058  | -1.771258913 |
| 1 | -4.884809256 | -0.624706443 | -3.165767437 |
| 1 | -4.695558009 | 1.243003491  | -1.561412616 |
| 1 | -2.796492736 | -1.818368388 | -3.933139008 |
| 1 | -0.609017925 | -1.090322096 | -2.956493711 |
| 6 | 1.166882931  | -2.735111879 | -0.146212203 |
| 6 | 1.196910565  | -4.135078867 | -0.142082504 |
| 6 | 0.000817579  | -4.830780788 | -0.001083226 |
| 6 | -1.195649535 | -4.135811248 | 0.140286476  |
| 6 | -1.166392384 | -2.735822564 | 0.145046426  |
| 7 | 0.000042863  | -2.060948531 | -0.000496368 |
| 1 | 2.129501856  | -4.668949389 | -0.282812431 |
| 1 | -2.127913266 | -4.670305670 | 0.280770336  |
| 6 | 1.627533843  | 0.803961002  | -2.402978012 |
| 6 | 2.772581333  | 0.984615236  | -3.161545661 |
| 6 | 3.854228626  | 0.125108614  | -2.927155066 |
| 6 | 3.739494002  | -0.887054531 | -1.981235916 |
| 6 | 2.538152636  | -1.009894562 | -1.251724861 |
| 7 | 1.525911173  | -0.146925005 | -1.451168591 |
| 1 | 4.778654712  | 0.233629639  | -3.491380253 |
| 1 | 0.752727649  | 1.436695593  | -2.529266692 |
| 1 | 2.821061377  | 1.776974556  | -3.904185604 |
| 1 | 4.556850068  | -1.582880808 | -1.829574246 |
| 6 | -2.538155282 | -1.011285769 | 1.251018409  |
| 6 | -3.738789138 | -0.890026919 | 1.981988406  |
| 6 | -3.853730670 | 0.121932493  | 2.928131927  |
| 6 | -2.772981391 | 0.982965790  | 3.161101681  |
| 6 | -1.628523404 | 0.803667838  | 2.401311633  |
| 7 | -1.526668955 | -0.147192769 | 1.449486866  |
| 1 | -4.777566724 | 0.229061781  | 3.493598564  |
| 1 | -4.555371018 | -1.587003099 | 1.831369744  |

|    |              |              |              |
|----|--------------|--------------|--------------|
| 1  | -2.821620188 | 1.775316644  | 3.903740037  |
| 1  | -0.754336877 | 1.437407866  | 2.526690128  |
| 7  | 2.373800766  | -2.018738178 | -0.293276911 |
| 6  | 3.590498856  | -2.684915184 | 0.186528101  |
| 1  | 3.988746012  | -3.415677214 | -0.529524918 |
| 1  | 4.350076175  | -1.926259692 | 0.384377420  |
| 1  | 3.366993436  | -3.189462936 | 1.128412274  |
| 7  | -2.373655772 | -2.020093401 | 0.292500608  |
| 6  | -3.590235855 | -2.687193821 | -0.186210065 |
| 1  | -3.987200814 | -3.418478149 | 0.530021287  |
| 1  | -4.350656153 | -1.929126774 | -0.383077761 |
| 1  | -3.367354335 | -3.191349453 | -1.128448258 |
| 7  | 2.360780889  | 2.092244603  | 0.455010941  |
| 7  | -2.359906689 | 2.093969720  | -0.455639074 |
| 6  | 3.571197645  | 2.705914525  | -0.101648599 |
| 1  | 4.087387826  | 3.353634357  | 0.619299310  |
| 1  | 4.257605626  | 1.918255886  | -0.423480973 |
| 1  | 3.302397828  | 3.292609107  | -0.981044877 |
| 6  | -3.569367750 | 2.708583695  | 0.102090992  |
| 1  | -4.087505303 | 3.353748130  | -0.619713126 |
| 1  | -4.254654933 | 1.921293363  | 0.427344496  |
| 1  | -3.298906316 | 3.297584432  | 0.979446762  |
| 1  | 0.002334201  | 5.975261529  | -0.002956513 |
| 1  | 0.001108097  | -5.919170857 | -0.001384328 |
| 24 | -0.000578920 | -0.009379138 | -0.001056238 |

-----  
 GIBBS FREE ENTHALPY

-----  
 The Gibbs free enthalpy is  $G = H - T \cdot S$

|                           |     |                   |                 |
|---------------------------|-----|-------------------|-----------------|
| Total enthalpy            | ... | -2916.24132917 Eh |                 |
| Total entropy correction  | ... | -0.09979641 Eh    | -62.62 kcal/mol |
| -----                     |     |                   |                 |
| Final Gibbs free enthalpy | ... | -2916.34112558 Eh |                 |
